# Supplementary material
Source: publisher figshare collection journal article supplement (https://diabetesjournals.figshare.com/articles/dataset/_/13053074)
Supplement: Supplementary file 1 [file 1]

***ABCC8 neonatal diabetes international collaboration***

*BIRDEM General Hospital, Dhaka, Bangladesh – Fauzia Mohsin;*

*Dalhousie University/IWK Health Centre, Halifax NS, Canada - Elizabeth Cummings;*

*McGill University, Montreal, Canada - Laurent LeGault;*

*McMaster University, Hamilton, ON, Canada - Zubin Punthakee;*

*McMaster Children's Hospital, Hamilton, ON, Canada - John Van Der Meulen;*

*School of Medicine, University of Chile, Santiago, Chile – Ethel Codner;*

*Centro de Diabetes Infantil, Clinica Las Condes, Chile – Vivian Gallardo;*

*University of Exeter, Exeter, UK – Meena Rafiq, Jayne Houghton, Kashyap Amratlal Patel, Tamsin Ford, Janani Kumaraguru Pillai, Roisin Finn, Ali Chakera;*

*Experimental and Clinical Research Center, Charité, Berlin, Germany - Klemens Raile;*

*Zentrum für Frauen-und Kindermedizin Padiatrie, Monchebergstr, Kassel, Germany - Martin Schebek;*

*DRK Kliniken Berlin, Westend, Germany - Andrea Werner;*

*All India Institute Of Medical Sciences, New Delhi, India – Vandana Jain;*

*The Royal Belfast Hospital for Sick Children, Belfast, Ireland - Emmeline Heffernan;*

*Department of General Pediatrics and Emergency, Unit of Pediatric Diabetology, Azienda Ospedaliero-Universitaria di Parma, Parma, Italy - Brunella Iovane;*

*Dept. of Experimental Medicine, University of Rome Tor Vergata, Rome, Italy - Lucia Russo;*

*Radboud University Medical Center, Nijmegen, Netherlands - Bastiaan De Galan;*

*Canisius-Wilhelmina Hospital, Nijmegen, Netherlands - Paul Voorhoeve;*

*University of Bergen, Norway – Pal Njolstad, Asta Sulen;*

*Children Faculty Hospital, Kosice, Slovakia - Adriana Dankovcikova;*

*Biomedical Research Centre, Slovak Academy of Sciences, Bratislava, Slovakia - Daniela Gasperikova;*

*Slovak Academy of Sciences and Medical Faculty of the Comenius University, Bratislava, Slovakia - Juraj Stanik;*

*Department of Pediatric Endocrinology and Metabolism, Kanuni Sultan Suleyman Training and Research Hospital, Istanbul, Turkey - Banu Aydin;*

*Department of Pediatric Endocrinology and Diabetes, Istanbul Faculty of Medicine, Istanbul University, Istanbul, Turkey - Firdevs Bas;*

*Department of Pediatric Endocrinology and Diabetes, Istanbul Faculty of Medicine, Istanbul University, Istanbul, Turkey - Ruveyde Bundak;*

*Department of Pediatric Endocrinology and Diabetes, Istanbul Faculty of Medicine, Istanbul University, Istanbul, Turkey - Feyza Darendeliler;*

*Spitalul Clinic de Pediatrie Sibiu, Sibiu, Romania – Stanca Raceala-Motoc;*

*Indiana University School of Medicine, Indiana, USA - Juan C Sanchez;*

*Lawndale Christian Health Center, Chicago, IL USA - Katherine E. Bauer, Kara W. Greeley*
