# Supplementary material
Source: publisher figshare collection journal article supplement (https://diabetesjournals.figshare.com/articles/dataset/_/13053074)
Supplement: Supplementary file 2 [file 1]

| CNS feature     | Pre SU transfer (n) | Post SU transfer (n) | Post transfer only (n) | Improvement on SU (n) |
|-----------------|---------------------|----------------------|------------------------|-----------------------|
| Any             | 13                  | 13                   | 0                      | 7                     |
| DD              | 10                  | 10                   | 1                      | 3                     |
| LD              | 7                   | 11                   | 2                      | 1                     |
| ADHD            | 6                   | 8                    | 2                      | 1                     |
| Epilepsy        | 4                   | 3                    | 2                      | 2**8                  |
| Muscle weakness | 2                   | 2                    | 0                      | 0                     |
| Anxiety         | 2                   | 2                    | 0                      | 0                     |
| Sleep problems  | 2                   | 2                    | 1                      | 0                     |
| Spasticity      | 2                   | 2                    | 0                      | 0                     |
| Autism          | 0                   | 0                    | 0                      | N/A                   |
| Other*          | 5                   | 4                    | 0                      | 1***                  |

**Supplementary Table S1. Neurological features present before and after transfer to sulfonylureas, and features that improved on SU transfer**

\*‘Other’ CNS features prior to sulfonylurea transfer in addition to the specific features listed consisted of obsessive-compulsive disorder (OCD) with mild Tourette’s, encopresis, hypertonia, hypotonia and an abnormal electroencephalogram (EEG) (in the absence of a diagnosis of epilepsy). These features were also present after sulfonylurea transfer with the exception of hypotonia (but not known if this was tested).

\*\*both individuals had seizures at time of diagnosis only which may have been attributable to cerebral oedema (Table S2)

§individuals treated with anti-epileptic medication not included as ‘improved’ (Table S2)

\*\*\*improved background on EEG

CNS = central nervous system, SU = sulfonylurea, DD = developmental delay, LD = learning difficulties, ADHD = attention deficit hyperactivity disorder

| <b>Mutation in<br/><i>ABCC8</i> gene</b>                                                       | <b>Age at<br/>diagnosis<br/>of diabetes<br/>(weeks)</b> | <b>Age at<br/>transfer<br/>to SU<br/>(years)</b> | <b>Clinical history</b>                                                                                                                                        | <b>Other neurological<br/>features present in<br/>addition to seizures /<br/>epilepsy</b> | <b>Neurological features improved on<br/>transfer to SU</b>                                                                               |
|------------------------------------------------------------------------------------------------|---------------------------------------------------------|--------------------------------------------------|----------------------------------------------------------------------------------------------------------------------------------------------------------------|-------------------------------------------------------------------------------------------|-------------------------------------------------------------------------------------------------------------------------------------------|
| <i>Individuals in whom metabolic disturbance at diagnosis may have contributed to seizures</i> |                                                         |                                                  |                                                                                                                                                                |                                                                                           |                                                                                                                                           |
| P45L/G1401R                                                                                    | 6                                                       | 8                                                | Diabetic ketoacidosis at 6 weeks of age with severe dehydration, reduced consciousness, opisthotonus and partial seizures - diagnosed with cerebral edema (23) | Muscle weakness, hypertonia, spasticity, DD, LD, and sleep problems                       | Improvements in sleep, speech, concentration and schoolwork noted by parents and teachers. No epilepsy at most recent follow-up.          |
| V215A/V215A                                                                                    | 9                                                       | 0.5                                              | Focal seizures around time of diagnosis: in left arm 2 days before admission and in left arm and leg 2 days after admission                                    | DD (mild), LD (mild)                                                                      | No seizures since 2 months of age but on antiepileptic drugs. Other features (DD / LD) identified only after SU transfer.                 |
| V86G/N                                                                                         | 5                                                       | 3                                                | Seizures only at time of diagnosis: none since.                                                                                                                | DD, LD, ADHD, anxiety                                                                     | Slight improvement. No anxiety post SU transfer and no further seizures. Main problem currently is speech delay / difficulties at school. |
| <i>Individuals in whom seizures are attributable to another (non-metabolic) cause</i>          |                                                         |                                                  |                                                                                                                                                                |                                                                                           |                                                                                                                                           |
| L1295F/N                                                                                       | 12                                                      | 6                                                | One seizure due to starting treatment with dexamethylphenidate for ADHD (no further seizures on stopping drug)                                                 | DD, LD, ADHD, muscle weakness                                                             | No change.                                                                                                                                |
| L135P/N                                                                                        | 6                                                       | 10                                               | Viral meningoencephalitis at 6 weeks of age, treated with Depakine 200-300mg at clinic follow-up prior to SU transfer                                          | Spastic paraplegia, DD, LD, sleep problems                                                | No change. Epilepsy not reported at recent follow-up but has had treatment with antiepileptic drugs                                       |

**Supplementary Table S2. Clinical details of patients in whom seizures / epilepsy may have been attributable to factors other than the genetic mutation.** SU = sulfonylurea, DD = developmental delay, LD = learning difficulties, ADHD = attention deficit hyperactivity disorder

| <b>Outcome on SU treatment</b>                                     | <b><i>ABCC8</i>-PNDM (n=21)</b> | <b><i>KCNJ11</i>-PNDM (n=81)</b> |
|--------------------------------------------------------------------|---------------------------------|----------------------------------|
| Patients independent of insulin at 10 years (%)                    | 86                              | 93                               |
| Median HbA1c at 10 years - paired (%)                              | 6.5 (n=16)                      | 6.4 (n=64)                       |
| Median SU dose required at 10 years - paired (mg/kg/day glyburide) | 0.25 (n=16)                     | 0.23 (n=64)                      |
| Median BMI at 10 years SDS (kg/m <sup>2</sup> )                    | -0.75 (n=13)                    | -0.22 (n=72)                     |
| Frequency of neurological features at 10 years (%)                 | 62 (n=21)                       | 64 (n=81)                        |
| Improvement in neurological features after SU transfer (%)         | 54 (n=13)                       | 47 (n=38)                        |
| Number of episodes of severe hypoglycemia on SU only over 10 years | 0 (n=18)                        | 0 (n=75)                         |
| Frequency of side effects (%)                                      | 11 (n=18)                       | 14 (n=81)                        |
| Frequency of diabetes complications (%)                            | 11 (n=18)                       | 9 (n=81)                         |

**Supplementary Table S3. Comparison of long-term outcomes in individuals with mutations in the *KCNJ11* and *ABCC8* genes.**

Comparative data on *KCNJ11*-PNDM taken from Bowman et al Lancet D&E 2018 (11) SU = sulfonylurea, PNDM = permanent neonatal diabetes mellitus, BMI = body mass index, SDS = standard deviation score
